# Supplementary material for: Importance of double-resonance effects in two-photon absorption properties of Au25(SR)18−
Source: Royal Society of Chemistry journal article supplement (doi:10.1039/c7sc00968b), 2017-01-01
Supplement: c7sc00968b1.pdf [file c7sc00968b1.pdf]

Supporting Information

**Importance of Double-Resonance Effects in Two-Photon  
Absorption Properties of  $\text{Au}_{25}(\text{SR})_{18}^-$**

Zhongwei Hu and Lasse Jensen\*

*The Pennsylvania State University, Department of Chemistry, 104 Chemistry Building,  
University Park, PA 16802, USA*

E-mail: jensen@chem.psu.edu

## TPA cross sections on a per gold atom basis as a function of the cluster size

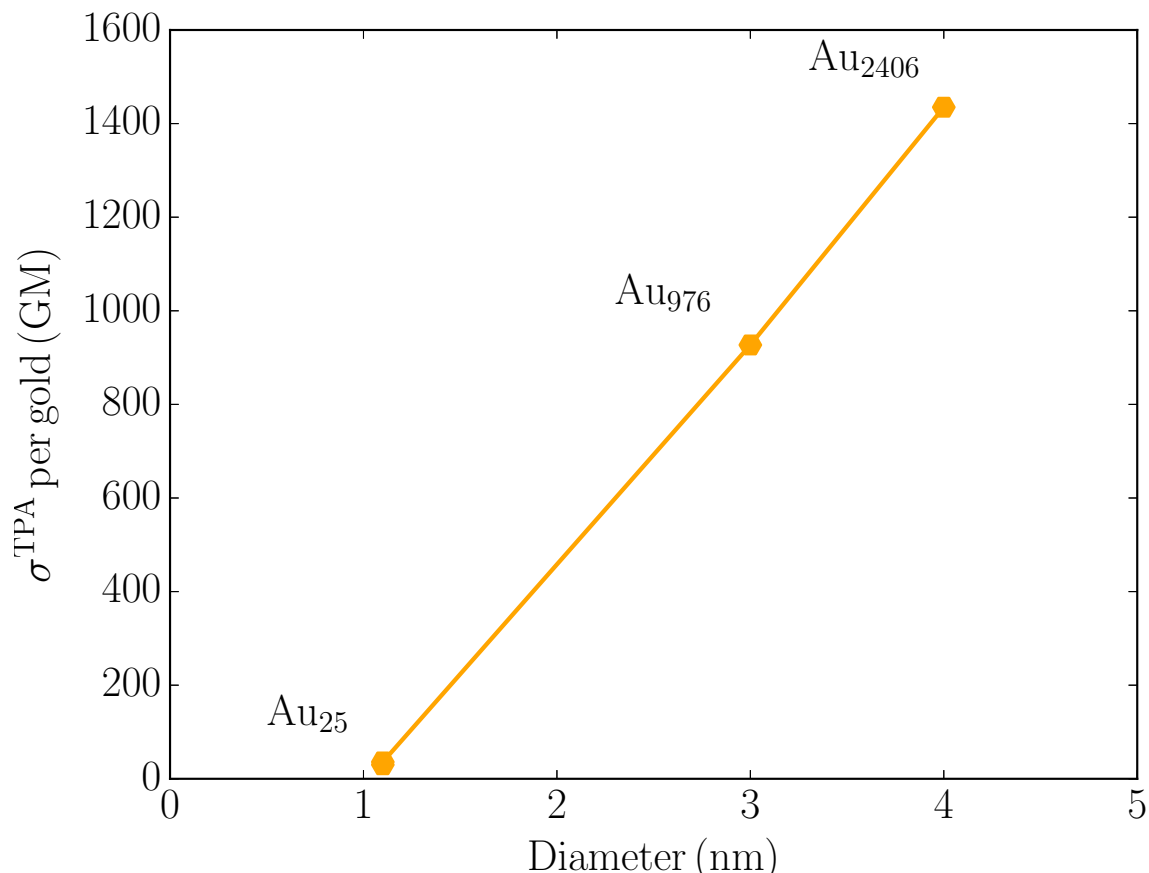

Figure 1: TPA cross section on a per atom basis for three different gold species. The values for the Au<sub>25</sub>(SH)<sub>18</sub><sup>−</sup> cluster is based on simulations while those for the Au<sub>976</sub> and the Au<sub>2406</sub> nanoparticles were obtained using the experimental data from Ref. 1.

## References

- (1) Ramakrishna, G.; Varnavskit, O.; Kim, J.; Lee, D.; Goodson, T. Quantum-Sized Gold Clusters as Efficient Two-Photon Absorbers. *J. Am. Chem. Soc.* **2008**, *130*, 5032.
